# Supplementary material
Source: publisher figshare collection journal article supplement (https://acs.figshare.com/ndownloader/files/10331421)
Supplement: Supplementary file 1 [file 10331421]

# **Insights on the mechanisms of H<sub>2</sub>S retention at low concentration on impregnated carbons**

*Randreanne L. C. B. Menezes; Karine O. Moura; Sebastião M. P. de Lucena; Diana C. S. Azevedo; Moises Bastos-Neto\**

Universidade Federal do Ceará - Departamento de Engenharia Química,  
Campus do Pici, bl. 709, 60760-400, Fortaleza - CE, Brazil

CORRESPONDING AUTHOR

e-mail: [mbn@ufc.br](mailto:mbn@ufc.br), telephone: +55 85 33669240, fax: +55 85 33669610

## S1. CHARACTERIZATION OF THE IMPREGNATED PHASES

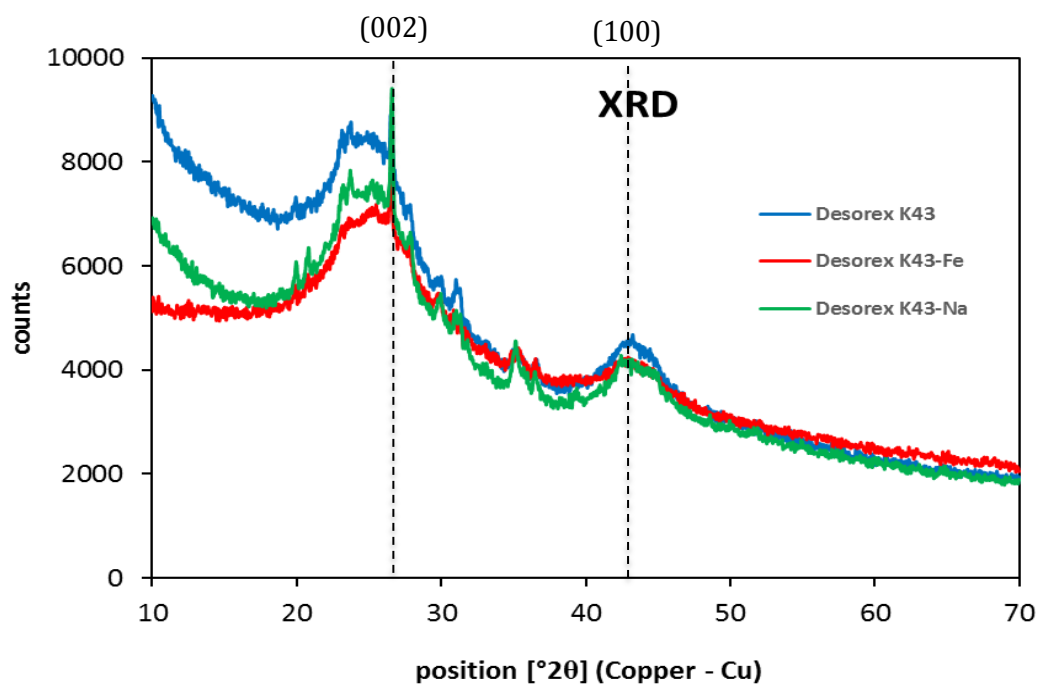

Figure S1 – X-Ray diffractograms of the samples K43, K43-Fe and K43-Na.

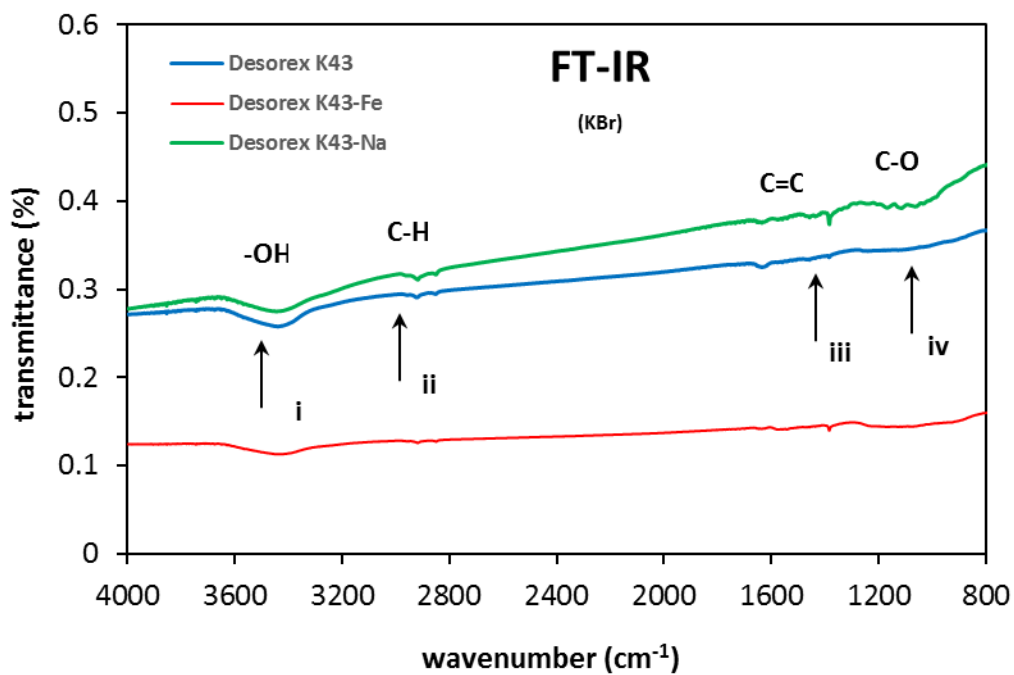

Figure S2 – FTIR spectra of the samples K43, K43-Fe and K43-Na.

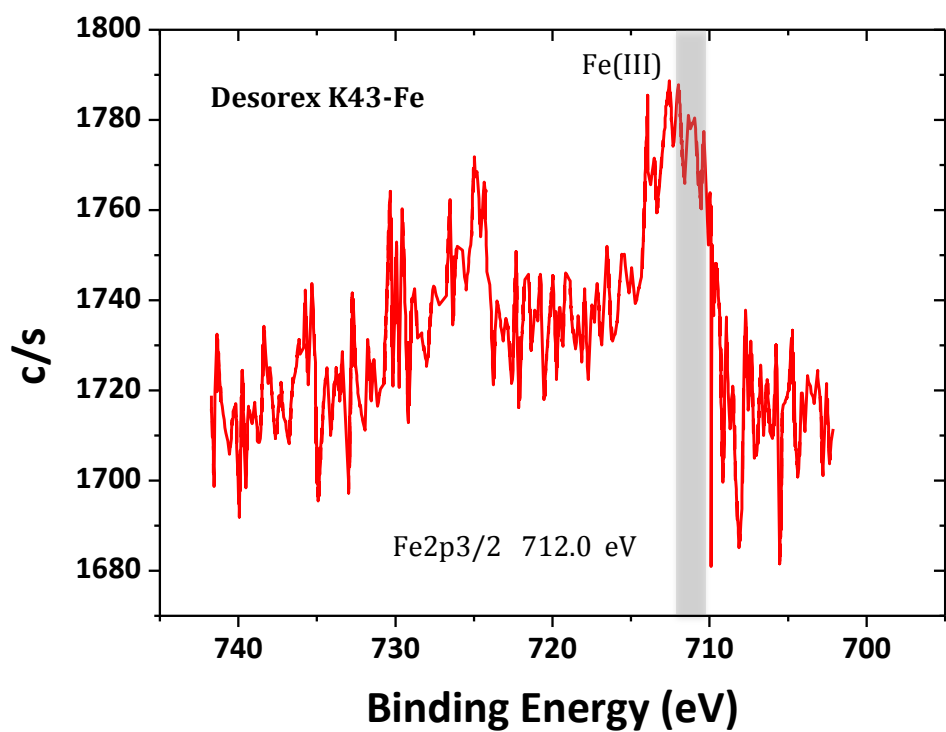

**Figure S3** – XPS spectrum of Fe<sub>2p3/2</sub> for the sample K43-Fe.

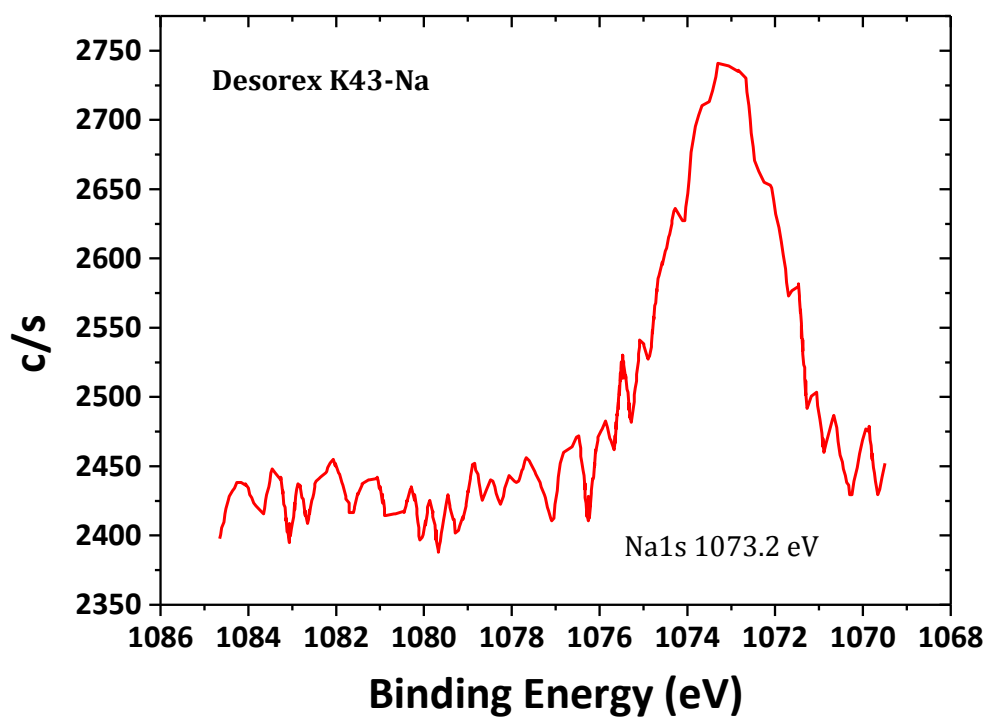

**Figure S4** – XPS spectrum of Na<sub>1s</sub> for the sample K43-Na.

**Table S1** - Atomic concentration table results from XPS.

| Sample/Species | C1s   | O1s   | Na1s | Al2p | Si2p | Fe2p |
|----------------|-------|-------|------|------|------|------|
| Desorex K43    | 91.72 | 6.82  | 0.01 | 0.51 | 0.82 | 0.13 |
| Desorex K43-Fe | 90.59 | 7.10  | 0.18 | 0.68 | 1.15 | 0.30 |
| Desorex K43-Na | 85.21 | 10.49 | 0.59 | 1.26 | 2.22 | 0.23 |

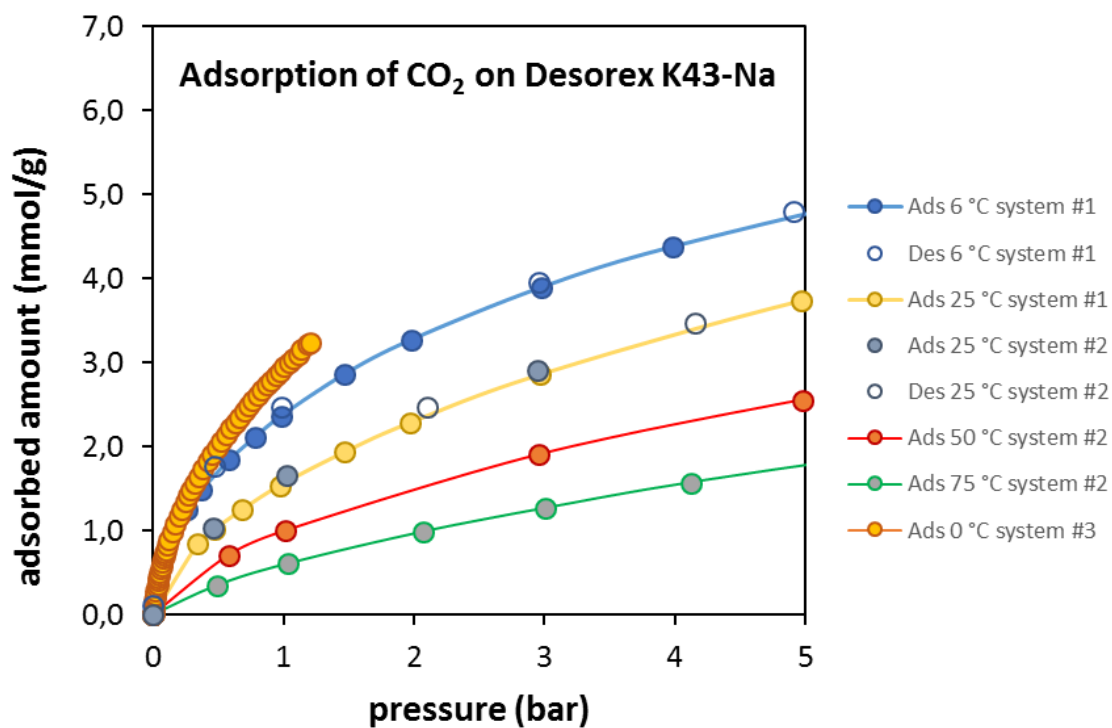

**Figure S5** – Adsorption isotherms of CO<sub>2</sub> at 0, 6, 25, 50 and 75 °C and pressures up to 5 bar were obtained with three different experimental systems.

## S2. MOLECULAR SIMULATION DETAILS

There is no experimental data of H<sub>2</sub>S adsorption heat on graphite surface, thus the reference used to calculate the carbon-H<sub>2</sub>S interaction parameter was the experimental adsorption heat of 40 kJ/mol obtained at infinite dilution on Westvaco's WVA 1100 activated carbon (Bagreev et al. <sup>1</sup>). Instead of a graphite surface, the calculation was done in a pore of 7 Å center-to-center (approximately equal to an effective pore of 4 Å) assuming that the experimental value at infinite dilution corresponds to the heat released during the filling of the smaller (more energetic) pores of the WVA 1100 carbon. For  $\epsilon_{\text{solid-solid}} = 36.4$  K, the value of 40 kJ/mol is obtained at the same concentration of 500 ppm H<sub>2</sub>S used in the experiment. Therefore the Lennard-Jones parameters used were: carbon with  $\sigma = 3.4$  Å (Steele) and a new  $\epsilon_{\text{s-s}} = 36.4$  K (this work). Molecule of H<sub>2</sub>S: model of Kristof and Liszi <sup>2</sup>.

With the corrected epsilon value we calculated the adsorbed amounts of H<sub>2</sub>S from 0 to 4000 ppm (0 to 400 Pa) in the center-to-center pores of 7 and 8.9 Å (approximately 4 and 6 Å effective) (Figure S6). An important aspect in the isotherms of figure S6 is the abrupt drop in the adsorption capacity between the pores of 7 and 8.9 Å.

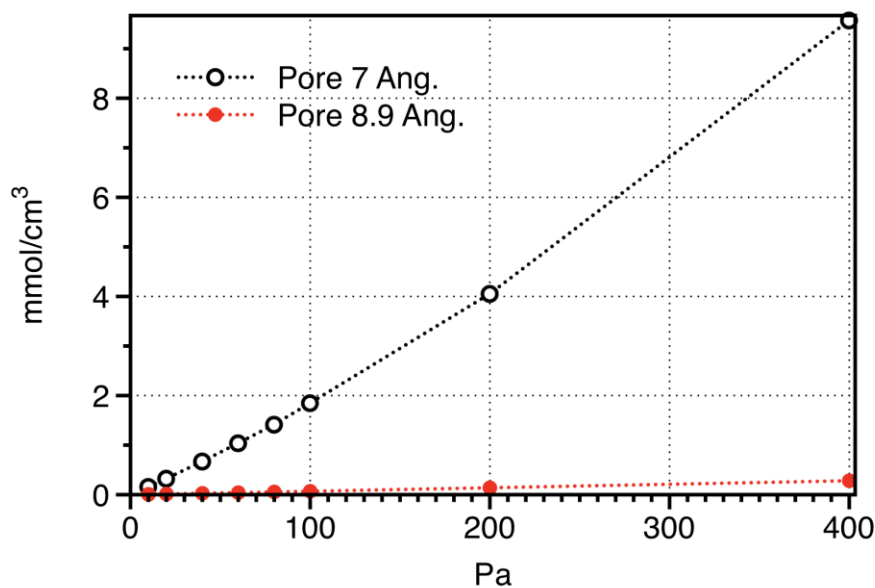

**Figure S6** – Simulated adsorption isotherms of H<sub>2</sub>S at 298 K on slit pores of 7 and 8.9 Å.

According to the methodology used previously (Lucena et al. <sup>3</sup>), from the isotherms simulated in the individual pores it is possible to predict the adsorption isotherm in activated carbons. The total gas uptake ( $Q_{total}$ ) for a carbon is determined by the sum of the products of the total volume of each pore ( $V_{pt}$ ) by the simulated uptake ( $q_{pore}$ ) in each pore:

$$Q_{total} = \sum_{m=1}^M V_{pt_m} q_{pore_m}$$

We observed that the PSDs of the carbons K43, K43-Na and K43-Fe can be approximated by two pores of 7 and 8.9 Å (approximately 4 and 6 Å effective) without significant loss of precision. Thus, every volume determined by the CO<sub>2</sub> isotherm at 273 was attributed to the pore of 7 Å and every volume of N<sub>2</sub> at 77 K to the pore of 8.9 Å.

The final physical adsorption values of H<sub>2</sub>S at 298 K and 100 ppm are 0.2, 0.18 and 0.3 mg/g on the activated carbons K43, K43-Fe and K43-Na respectively (Table S2)

**Table S2** – Simulated total uptake of H<sub>2</sub>S ( $Q_{total}$ ) on the activated carbons at 298 K and 100 ppm (10 Pa).

|                                                               | <b>K43</b>                                             |                                                       | <b>K43-Fe</b>                                          |                                                       | <b>K43-Na</b>                                          |                                                       |
|---------------------------------------------------------------|--------------------------------------------------------|-------------------------------------------------------|--------------------------------------------------------|-------------------------------------------------------|--------------------------------------------------------|-------------------------------------------------------|
|                                                               | V <sub>p</sub> CO <sub>2</sub><br>(cm <sup>3</sup> /g) | V <sub>p</sub> N <sub>2</sub><br>(cm <sup>3</sup> /g) | V <sub>p</sub> CO <sub>2</sub><br>(cm <sup>3</sup> /g) | V <sub>p</sub> N <sub>2</sub><br>(cm <sup>3</sup> /g) | V <sub>p</sub> CO <sub>2</sub><br>(cm <sup>3</sup> /g) | V <sub>p</sub> N <sub>2</sub><br>(cm <sup>3</sup> /g) |
|                                                               | 0.0207                                                 | 0.37                                                  | 0.0177                                                 | 0.36                                                  | 0.0426                                                 | 0.3                                                   |
|                                                               | <b>Pores</b>                                           |                                                       |                                                        |                                                       |                                                        |                                                       |
|                                                               | <b>7 Å</b>                                             | <b>8.9 Å</b>                                          | <b>7 Å</b>                                             | <b>8.9 Å</b>                                          | <b>7 Å</b>                                             | <b>8.9 Å</b>                                          |
| Theoretical H <sub>2</sub> S Adsorbed (mmol/cm <sup>3</sup> ) | 0.1621                                                 | 0.0068                                                | 0.1621                                                 | 0.0068                                                | 0.1621                                                 | 0.0068                                                |
| $q_{pore}$ (mmol/g)                                           | 0.0033                                                 | 0.0025                                                | 0.0025                                                 | 0.0024                                                | 0.0069                                                 | 0.0020                                                |
| <b><math>Q_{total}</math> (mg/g)</b>                          | <b>0.2</b>                                             |                                                       | <b>0.18</b>                                            |                                                       | <b>0.3</b>                                             |                                                       |

The force field was validated for a complete H<sub>2</sub>S isotherm on the Norit RB4 activated carbon (experimental data extracted from Cruz et al. <sup>4</sup>). Unlike the carbons K43-Fe and K43-Na, the activated carbon Norit RB4 has no impregnating material. It has an area of 1320 m<sup>2</sup>/g and a wider PSD, reason for which it is better represented by 3 pores with center-to-center sizes of 7, 8.9 and 18.5 Å (approximately 4, 6 and 15.5 Å effective). Based on the RB4 PSD, the determined pore volumes are 0.0178, 0.166 and 0.389 cm<sup>3</sup>/g for the pores of 7, 8.9 and 18.5 Å, respectively. The experimental and simulated H<sub>2</sub>S isotherms at 298 K are compared in Figure S7, showing a very good match between both curves.

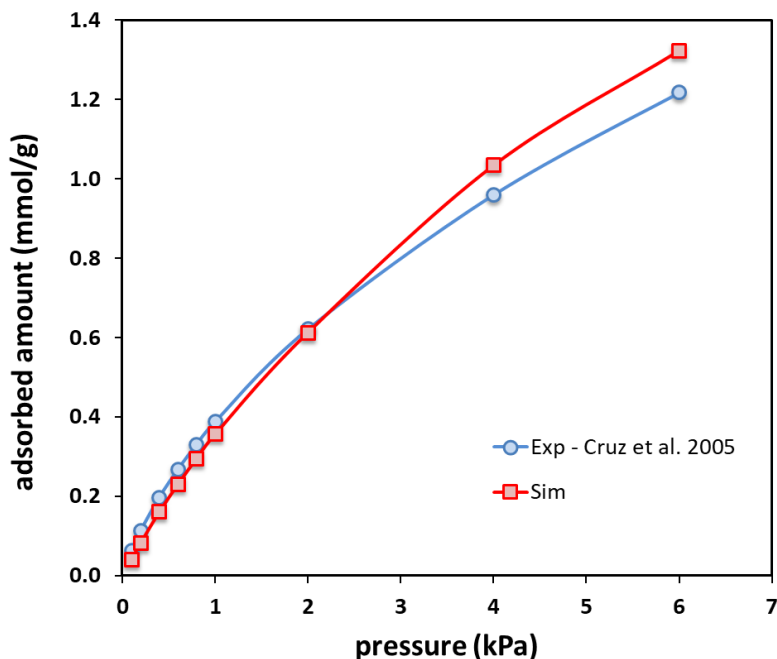

**Figure S7** – Comparison between simulated and experimental data for H<sub>2</sub>S adsorption on carbon Norit RB4 – Model validation.

## References

- (1) Bagreev, A.; Adib, F.; Bandosz, T. J., Initial heats of H<sub>2</sub>S adsorption on activated carbons: Effect of surface features. *Journal of Colloid and Interface Science*, **1999**, 219, 327–332.
- (2) Kristof, T.; Liszi, J., Effective intermolecular potential for fluid hydrogen sulfide. *J. Phys. Chem. B*, **1997**, 101, 5480–5483.
- (3) Lucena, S. M. P.; Gomes, V. A.; Gonçalves, D. V.; Mileo, P. G. M.; Silvino, P. F. G., Molecular simulation of the accumulation of alkanes from natural gas in carbonaceous materials. *Carbon*, **2013**, 61, 624 –632.
- (4) Cruz, A.J.; Pires, J.; Carvalho, A.P.; de Carvalho, M.B., Physical adsorption of H<sub>2</sub>S related to the conservation of works of art: The role of the pore structure at low relative pressure. *Adsorption*, **2005**, 11, 569–576.
